# Supplementary material for: Screen time use in children under 3 years old: a systematic review of correlates
Source: Springer Nature journal article supplement (doi:10.1186/1479-5868-10-102), 2013-01-01
Supplement: 12966_2012_795_MOESM3_ESM.pdf [file 12966_2012_795_MOESM3_ESM.pdf]

**Table 2. Summary of Correlates**

| Variable Type                                   | Variable                                                     | Positive Association                       | Negative Association | No Association           | Association (% of studies examining variable that support association) | Consistency Strength |
|-------------------------------------------------|--------------------------------------------------------------|--------------------------------------------|----------------------|--------------------------|------------------------------------------------------------------------|----------------------|
| <b>Child Biological and Demographic Factors</b> |                                                              |                                            |                      |                          |                                                                        |                      |
|                                                 | Sex                                                          | 35                                         |                      | 3,4,12,14,35,36,38,43,46 | NA (9/10=90%)                                                          | S*                   |
|                                                 | Child's age                                                  | 3,4,10,12,14,15,17,23,29,33,36,39,40,42,43 | 37<br>a              | 12,31                    | (+) (15/17=88%)                                                        | S*                   |
|                                                 | Ethnicity/race (non-Caucasian)                               | 3,4,8,15,17,34,43,47<br>b                  | 17<br>c              | 14,46                    | (+) (8/11=73%)                                                         | S*                   |
|                                                 | First born                                                   |                                            |                      | 4,12,36                  | NA (3/3=100%)                                                          | S                    |
|                                                 | BMI                                                          | 3,36,38,43                                 |                      |                          | (+) (4/4 100%)                                                         | S*                   |
| <b>Family Biological/ Demographic Factors</b>   |                                                              |                                            |                      |                          |                                                                        |                      |
|                                                 | Maternal age                                                 |                                            | 33,38,40             | 12,14,34,44              | U (4/7=57%)                                                            |                      |
|                                                 | Maternal education                                           |                                            | 4,34,36,38,43        | 3,12,13,15,31,44,46      | U (7/12=58%)                                                           |                      |
|                                                 | Paternal education                                           |                                            | 15                   | 4,14                     | NA (2/3=67%)                                                           | M                    |
|                                                 | Parental Education (data not disaggregated)                  |                                            | 3                    |                          | IN                                                                     |                      |
|                                                 | Maternal employment (employed)                               |                                            |                      | 4,14,34,36,44,46         | NA (6/6=100%)                                                          | S*                   |
|                                                 | Paternal employment (employed)                               |                                            |                      | 4                        | IN                                                                     |                      |
|                                                 | Household Income                                             |                                            | 17,30,32,33,43       | 4,14,15,31,46            | U (5/10=50%)                                                           |                      |
|                                                 | Maternal BMI (Obese)                                         | 44                                         |                      |                          | IN                                                                     |                      |
|                                                 | Language (non-English speaking)                              |                                            | 17<br>c              | 12,14,43                 | NA (3/4=75%)                                                           | S                    |
|                                                 | Mother non-US born                                           | 12<br>f                                    |                      | 12<br>g                  | IN                                                                     |                      |
| <b>Family Structure Variables</b>               |                                                              |                                            |                      |                          |                                                                        |                      |
|                                                 | Two parent household                                         |                                            | 38                   | 12,15,43,44,46           | NA (5/6=83%)                                                           | S*                   |
|                                                 | Number of children in home                                   |                                            | 15<br>d              | 14,36,43                 | NA (3/4=75%)                                                           | S                    |
| <b>Sociocultural/ Environmental Factors</b>     |                                                              |                                            |                      |                          |                                                                        |                      |
|                                                 | Cognitive stimulation at home (as measured by HOME or StimQ) | 4<br>e                                     | 8,38                 |                          | (-) (2/3=67%)                                                          | S                    |
|                                                 | Distressed/ depressed mother                                 | 30,34,38,41,45                             |                      | 4,43,44                  | (+) (5/8 = 63%)                                                        | M*                   |
|                                                 | Non-parental child care                                      |                                            | 4                    | 12,14,15,38              | NA (4/5=80%)                                                           | S*                   |
|                                                 | Lives in urban area                                          | 36<br>h                                    |                      | 14                       | IN                                                                     |                      |
|                                                 | Season (winter)                                              | 31                                         |                      |                          | IN                                                                     |                      |

|                                                                                                                                                                                                                                                                                                                                                                                                                                                                                                                                                                                                                                                                                                                                                                                                                                                                                                                                                                                                                           |                                                           |          |    |    |              |   |
|---------------------------------------------------------------------------------------------------------------------------------------------------------------------------------------------------------------------------------------------------------------------------------------------------------------------------------------------------------------------------------------------------------------------------------------------------------------------------------------------------------------------------------------------------------------------------------------------------------------------------------------------------------------------------------------------------------------------------------------------------------------------------------------------------------------------------------------------------------------------------------------------------------------------------------------------------------------------------------------------------------------------------|-----------------------------------------------------------|----------|----|----|--------------|---|
|                                                                                                                                                                                                                                                                                                                                                                                                                                                                                                                                                                                                                                                                                                                                                                                                                                                                                                                                                                                                                           | Television in bedroom                                     | 3,46     |    |    | IN           |   |
|                                                                                                                                                                                                                                                                                                                                                                                                                                                                                                                                                                                                                                                                                                                                                                                                                                                                                                                                                                                                                           | Parent belief child enjoys TV                             | 33,40    |    |    | IN           |   |
|                                                                                                                                                                                                                                                                                                                                                                                                                                                                                                                                                                                                                                                                                                                                                                                                                                                                                                                                                                                                                           | Parent belief in educational value of TV                  | 33,46    |    |    | IN           |   |
|                                                                                                                                                                                                                                                                                                                                                                                                                                                                                                                                                                                                                                                                                                                                                                                                                                                                                                                                                                                                                           | Heavy TV use in the home (includes background television) | 13       |    |    | IN           |   |
|                                                                                                                                                                                                                                                                                                                                                                                                                                                                                                                                                                                                                                                                                                                                                                                                                                                                                                                                                                                                                           | Shorter breastfeeding                                     | 43       |    |    | IN           |   |
|                                                                                                                                                                                                                                                                                                                                                                                                                                                                                                                                                                                                                                                                                                                                                                                                                                                                                                                                                                                                                           | TV viewing time of father                                 | 36       |    |    | IN           |   |
|                                                                                                                                                                                                                                                                                                                                                                                                                                                                                                                                                                                                                                                                                                                                                                                                                                                                                                                                                                                                                           | TV viewing time of mother                                 | 36,43,44 |    |    | (+) 3/3=100% | S |
|                                                                                                                                                                                                                                                                                                                                                                                                                                                                                                                                                                                                                                                                                                                                                                                                                                                                                                                                                                                                                           | Time/ content restrictions                                |          |    | 31 | IN           |   |
| <b>Behavioral Factors</b>                                                                                                                                                                                                                                                                                                                                                                                                                                                                                                                                                                                                                                                                                                                                                                                                                                                                                                                                                                                                 |                                                           |          |    |    |              |   |
|                                                                                                                                                                                                                                                                                                                                                                                                                                                                                                                                                                                                                                                                                                                                                                                                                                                                                                                                                                                                                           | Daily sleep duration of child                             |          | 43 |    | IN           |   |
|                                                                                                                                                                                                                                                                                                                                                                                                                                                                                                                                                                                                                                                                                                                                                                                                                                                                                                                                                                                                                           | Infant crying duration                                    | 44       |    |    |              |   |
|                                                                                                                                                                                                                                                                                                                                                                                                                                                                                                                                                                                                                                                                                                                                                                                                                                                                                                                                                                                                                           | Onset age of watching TV                                  | 4        |    |    | IN           |   |
| <p>a = background television; b = for children 12-23 months of English-speaking Latino mothers only, c = for children 24-35 months of Spanish-speaking, Latino mothers only, d=association only for 2 or more siblings; e=for infants 0-11 months, f= at 33 months only; g= at 21 months only; h=weekends only</p> <p>(+)= positive association<br/>                 (-) = negative association<br/>                 NA =studies consistently report no association<br/>                 U = Unclear association (fewer than 60% of studies support any association or non-association)<br/>                 (S) = Strong consistency (70-100% of studies support the reported association or non-association )<br/>                 (M) = Moderate consistency (60-70% of studies support the reported association or non-association)<br/>                 * = 4 or more studies support the given association/non-association<br/>                 IN = inconclusive (variable not studied on 3 or more occasions)</p> |                                                           |          |    |    |              |   |

<sup>3</sup>(Dennison et al., 2002), <sup>4</sup>(Certain & Khan, 2002), <sup>8</sup>(Mendolsohn et al., 2011), <sup>10</sup>(Thompson & Christakis, 2005), <sup>11</sup>(Tomopoulos et al., 2010), <sup>12</sup>(Tomopoulos et al., 2007), <sup>13</sup>(Vandewater et al., 2005), <sup>14</sup>(Zimmerman & Christakis, 2005), <sup>15</sup>(Zimmerman et al., 2007), <sup>17</sup>(Thompson et al., 2010), <sup>23</sup>(Linebarger, & Walker, 2005), <sup>29</sup>(Anand & Krosnick, 2005), <sup>30</sup>(Bank et al., 2011), <sup>31</sup>(Barr, et al., 2010), <sup>32</sup>(Cheng, et al., 2010), <sup>33</sup>(Dalzell, et al., 2000), <sup>34</sup>(Horodyski et al., 2010), <sup>35</sup>(Huston, et al., 1999), <sup>36</sup>(Kourlaba et al., 2009), <sup>37</sup>(LaPierre et al., 2012), <sup>38</sup>(Lumeng et al., 2006), <sup>40</sup>(Masur & Flynn, 2008), <sup>41</sup>(McLearn et al., 2006), <sup>42</sup>(Ruangdaraganon et al., 2009), <sup>43</sup>(Schmit et al., 2009), <sup>44</sup>(Thompson et al., 2013), <sup>45</sup>(Thompson & Christakis, 2007), <sup>46</sup>(Vandewater et al., 2007), <sup>47</sup>(Flores et al., 2005).
