# Supplementary material for: Screen time use in children under 3 years old: a systematic review of correlates
Source: Springer Nature journal article supplement (doi:10.1186/1479-5868-10-102), 2013-01-01
Supplement: 12966_2012_795_MOESM3_ESM.pdf [file 12966_2012_795_MOESM3_ESM.pdf]

登录


欢迎来到顺通转运！
微信汇率：1円 ≈ 0.052344元
支付宝汇率：1円 ≈ 0.052702元

- 运输渠道 

  :   服务收费
  :   顺通CC包税线
- 顺通商城 

  :   日本商城
  :   国内商城
- 二手代拍 

  :   煤炉代拍
  :   paypay商城
  :   乐天二手
- 新品代拍 

  :   日本亚马逊
  :   乐天新品
- 代购代拍 

  :   雅虎代拍
      实体店代购
- 线上代拍
- 帮助中心 

  :   CC线教程手机版
      使用教程
      CC线教程电脑版

欢迎登录顺通速运


记住密码，以后自动登录

登录
