# Supplementary figures and images for: Screen time use in children under 3 years old: a systematic review of correlates
Source: Springer Nature journal article supplement (doi:10.1186/1479-5868-10-102), 2013-01-01

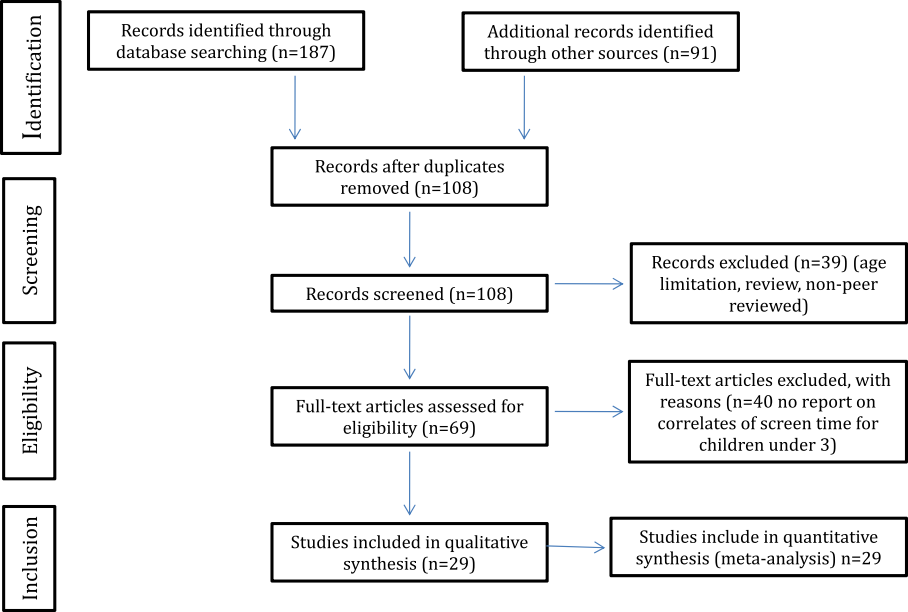

Supplement: 12966_2012_795_MOESM1_ESM.pdf [file 12966_2012_795_MOESM1_ESM.pdf]
